# Supplementary material
Source: publisher figshare collection journal article supplement (https://frontiersin.figshare.com/ndownloader/files/35165119)

**Raw Treated**

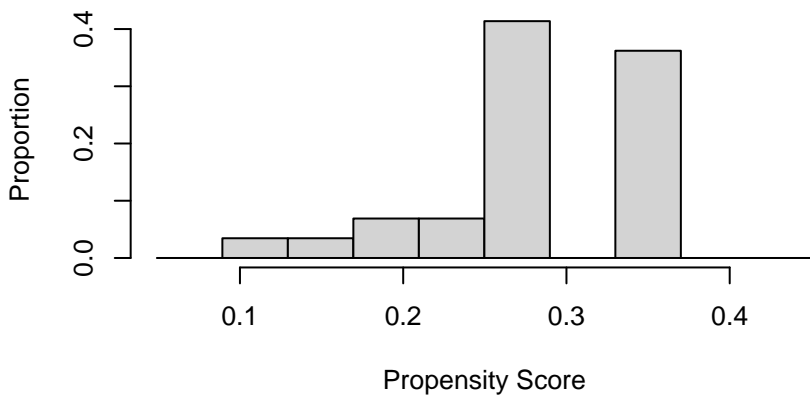

**Matched Treated**

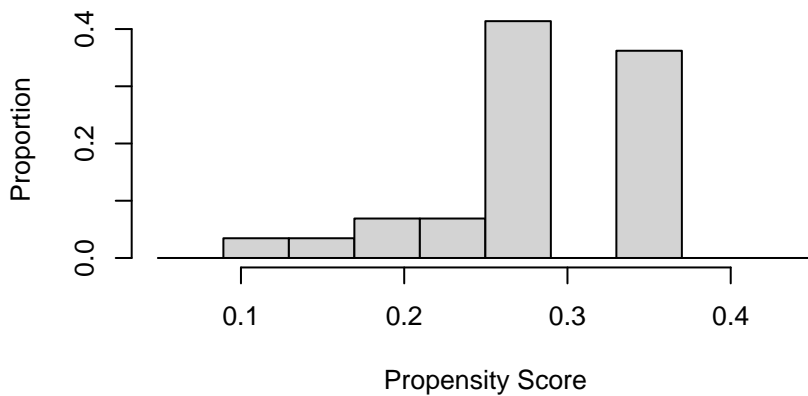

**Raw Control**

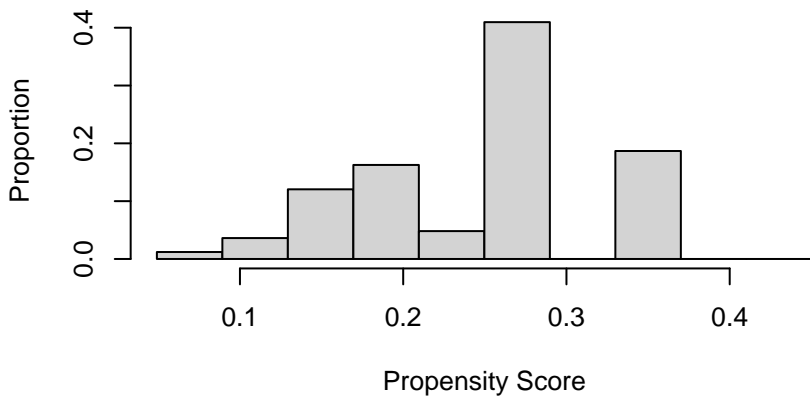

**Matched Control**

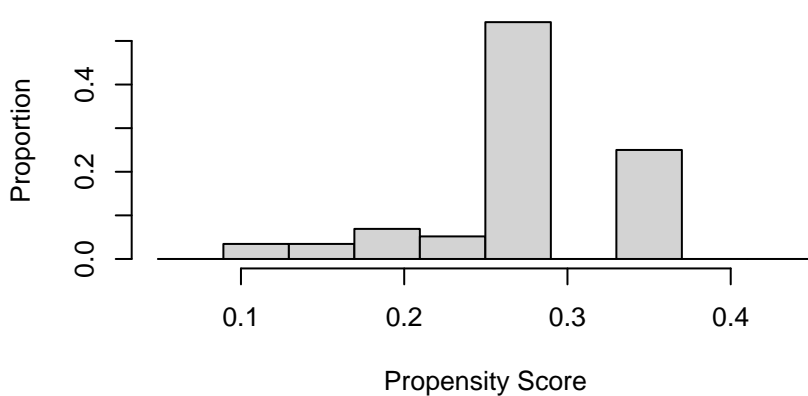

Supplement: Supplementary file [file 35165119]
